# Supplementary material for: Relationship between the Expression of CHK2 and p53 in Tumor Tissue and the Course of Papillary Thyroid Cancer in Patients with CHEK2 Germline Mutations
Source: MDPI journal article supplement (doi:10.3390/cancers16040815), 2024-02-17
Supplement: s1 [file s1]

Figure S1: Posterior distribution of the odds log ratio for the relationships between clinicopathological features and CHK2 expression, *TP53* gene status, and p53 expression together with *TP53* gene status in tumor tissues from PTC patients with and without *CHEK2* germline mutations

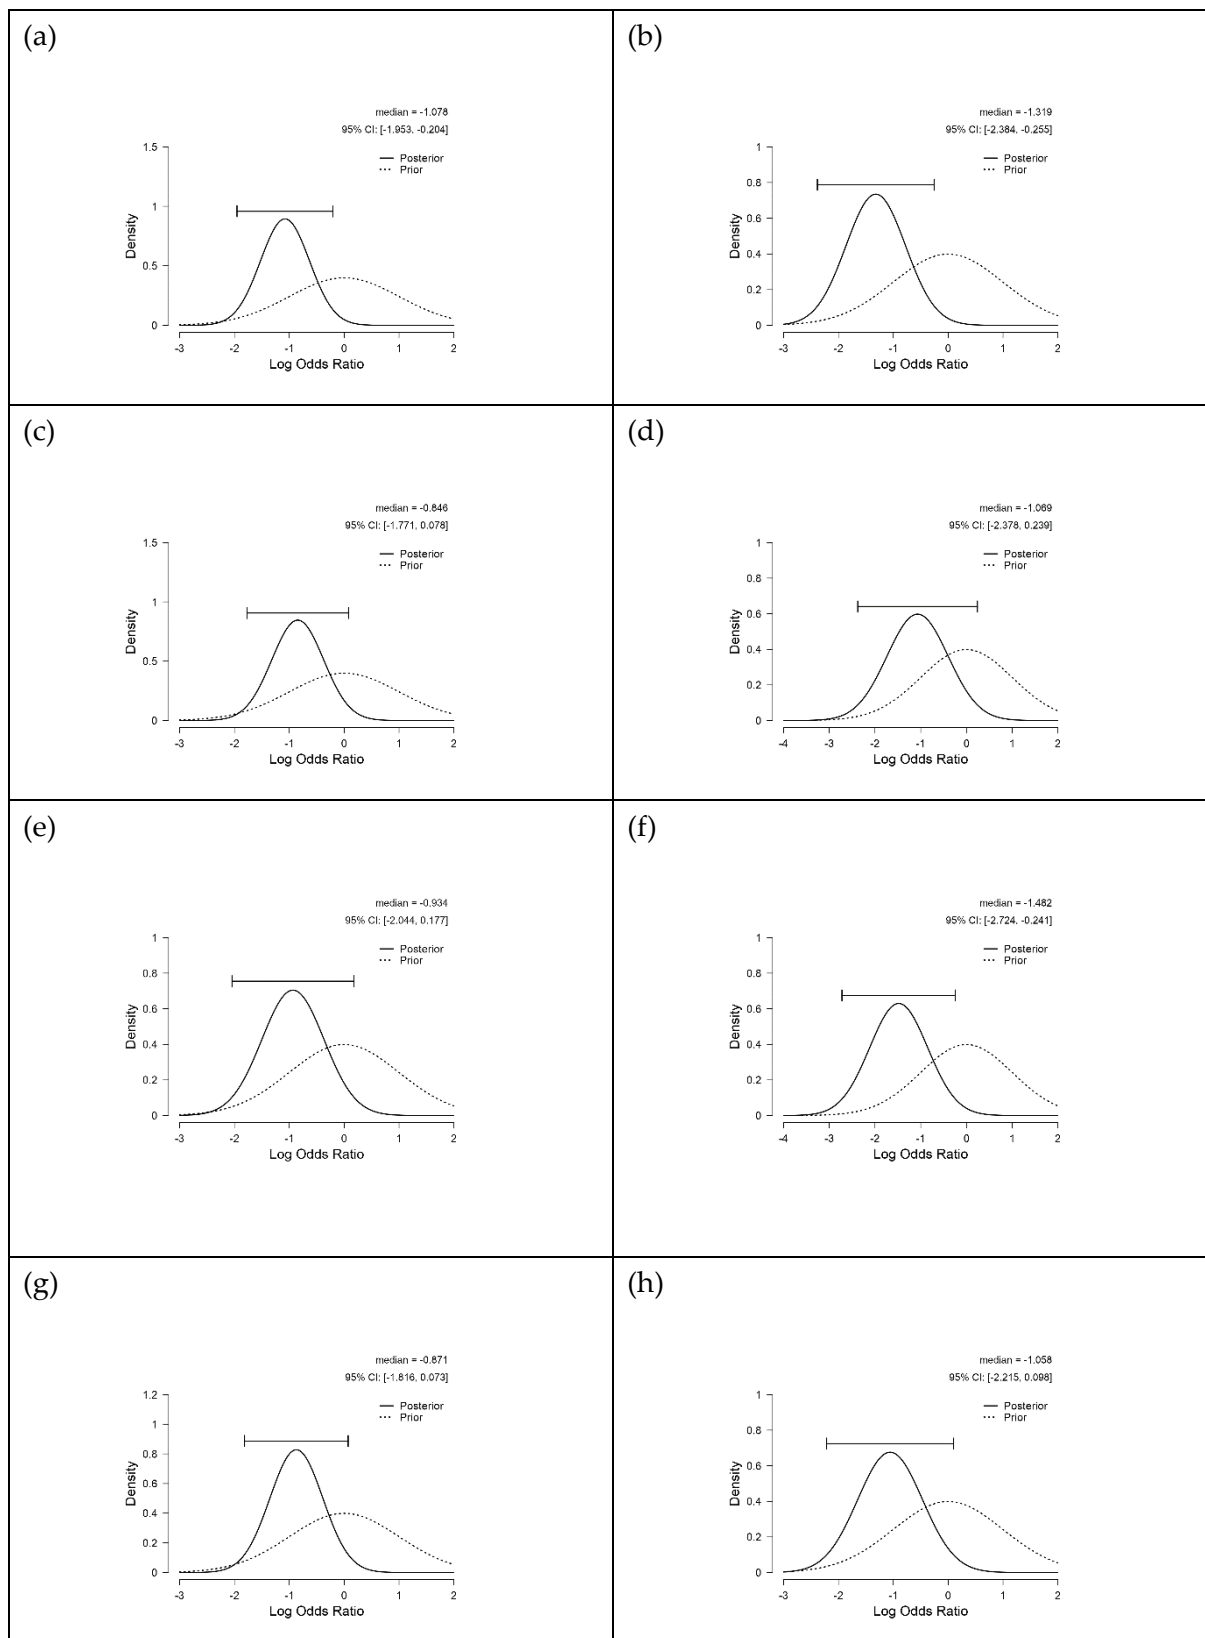

(a) CHK2 expression and response to therapy; (b) CHK2 expression and final follow-up; (c) CHK2 expression and tumor diameter; (d) CHK2 expression and PTC histologic variant; (e) *TP53* gene status and age; (f) *TP53* gene status and vascular invasion; (g) p53

expression + *TP53* gene status and age; (h) p53 expression and *TP53* gene status and vascular invasion. Abbreviation: 95% CI, 95% credible interval.

Figure S2: Sequential analysis for the relationships between clinicopathological features and *CHK2* expression, *TP53* gene status, and p53 expression together with *TP53* gene status in the tumor tissues of PTC patients with and without *CHK2* germline mutations

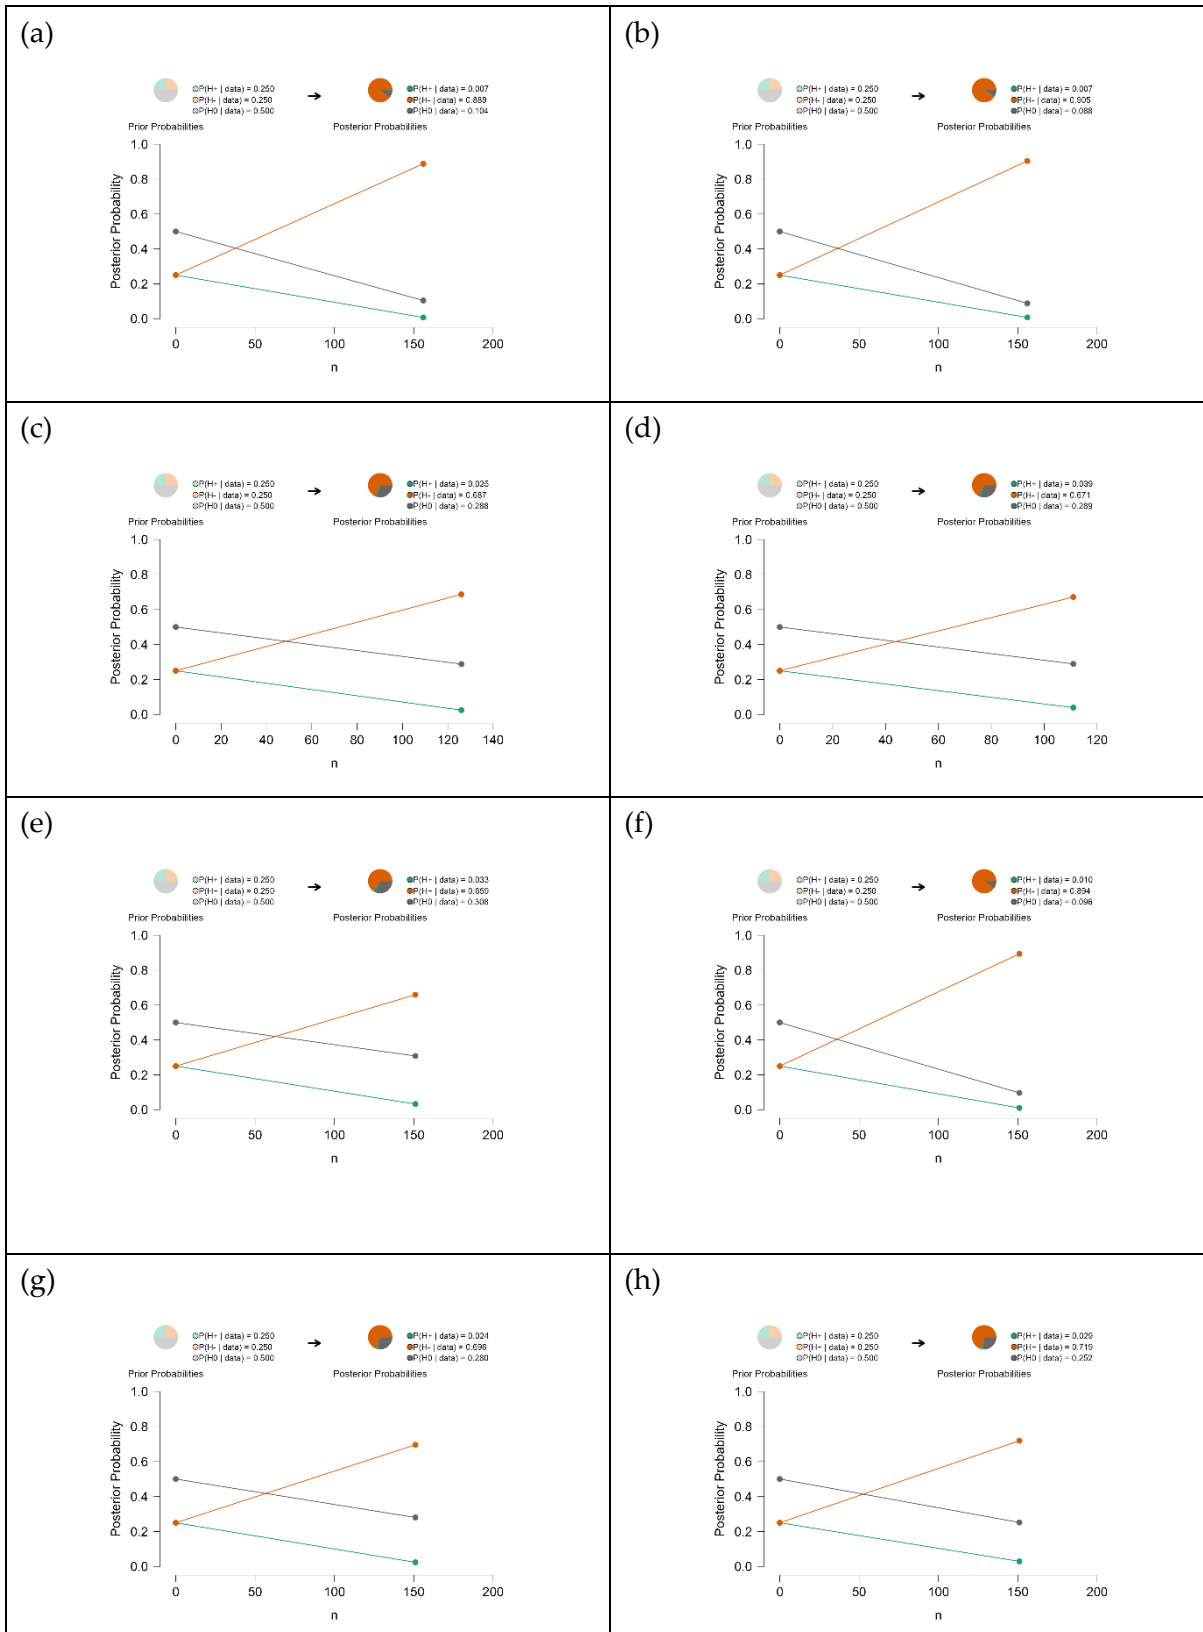

(a) *CHK2* expression and response to therapy; (b) *CHK2* expression and final follow-up; (c) *CHK2* expression and tumor diameter; (d) *CHK2* expression and PTC histologic variant; (e) *TP53* gene status and age; (f) *TP53* gene status and vascular invasion; (g) p53 expression together with *TP53* gene status and age; (h) p53 expression together with *TP53* gene status and vascular invasion. Abbreviations:  $P(H+|data)$ , the probability of hypothesis  $H+$  given the data;  $P(H-|data)$ , the probability of hypothesis  $H-$  given the data;  $P(H0|data)$ , the probability of hypothesis  $H0$  given the data.

Figure S3: Posterior distribution of the odds log ratio for the association between *CHEK2* gene status, *CHK2* expression, and the p53 expression together with *TP53* gene status in tumor tissues from PTC patients with and without the *CHEK2* germline mutations

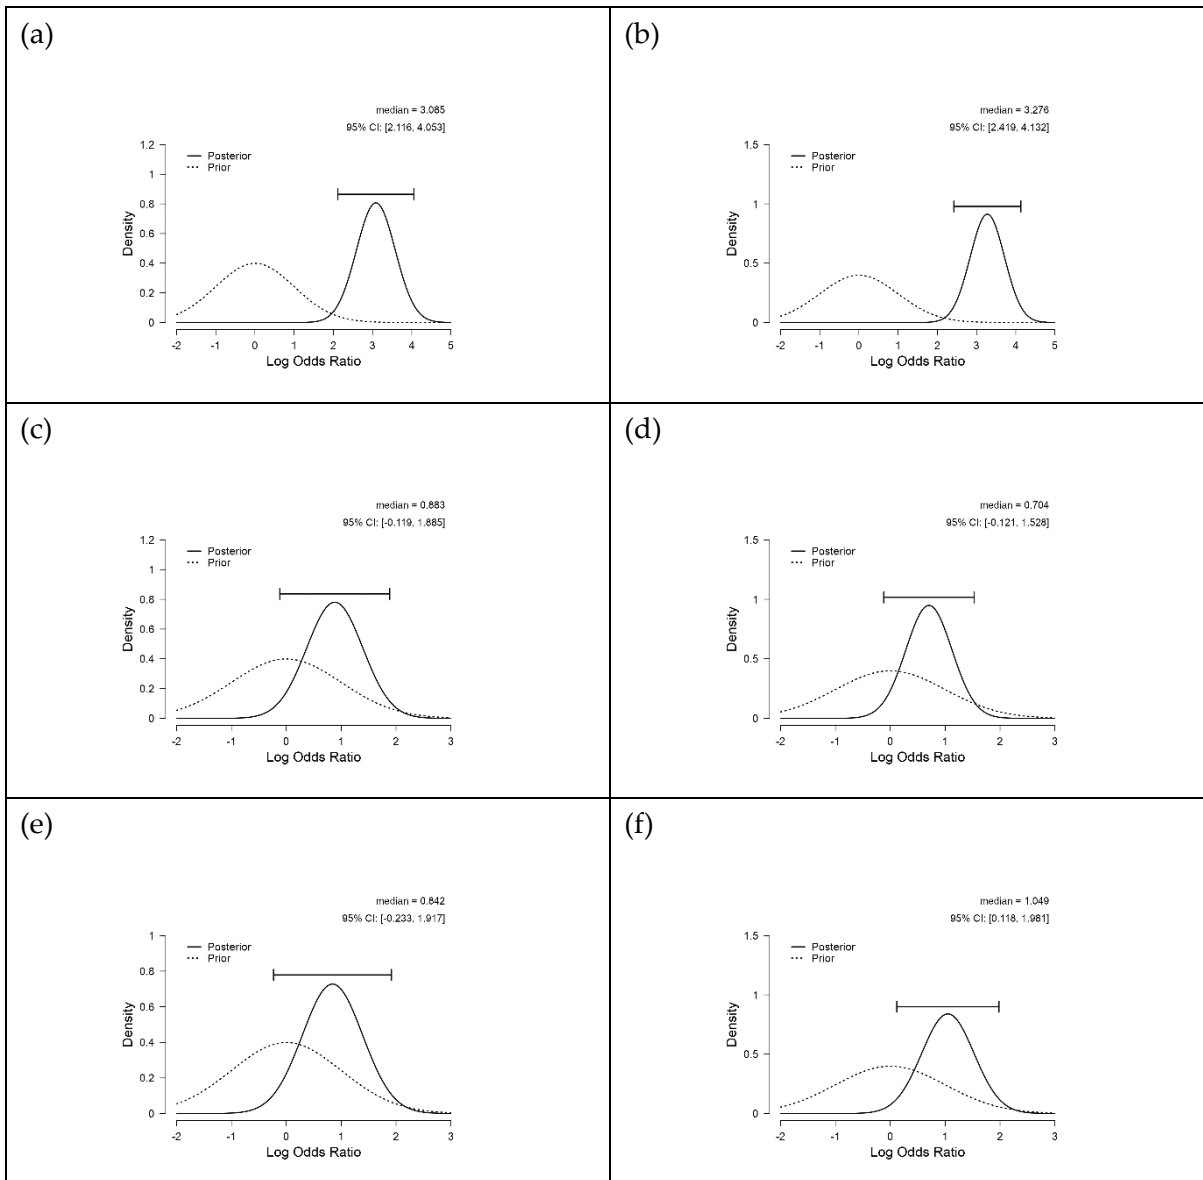

(a) *CHEK2* gene status vs. *CHEK2* truncating mutation and WT; (b) *CHEK2* gene status vs. *CHEK2* truncating mutation and WT group + missense I157T mutation group; (c) *CHEK2* expression vs. *CHEK2* truncating mutation and WT; (d) *CHEK2* expression vs. *CHEK2* truncating and WT group + missense I157T mutation group; (e) p53 expression and *TP53* gene status vs. *CHEK2* truncating mutation and WT; (f) p53 expression and *TP53* gene status vs. *CHEK2* expression vs. *CHEK2* truncating mutation and WT group + missense I157T mutation group. Abbreviations: 95% CI, 95% credible interval; *CHEK2* gene status, no loss/deletion of a *CHEK2* gene copy; *TP53* gene status, no loss/deletion of a *TP53* gene copy as determined by FISH; FISH, fluorescence in situ hybridization; p53 expression, negative/positive as determined by IHC; IHC, immunohistochemistry; *CHEK2* truncating, germline heterozygous truncating *CHEK2* mutation variants (1100delC, IVS2+1G>A, del5395); WT, wild type.

Figure S4: Sequential analysis of the associations between *CHEK2* gene status, *CHK2* expression as determined by IHC, and *p53* expression together with *TP53* gene status as determined by FISH in tumor tissues from PTC patients with and without the *CHEK2* germline mutations

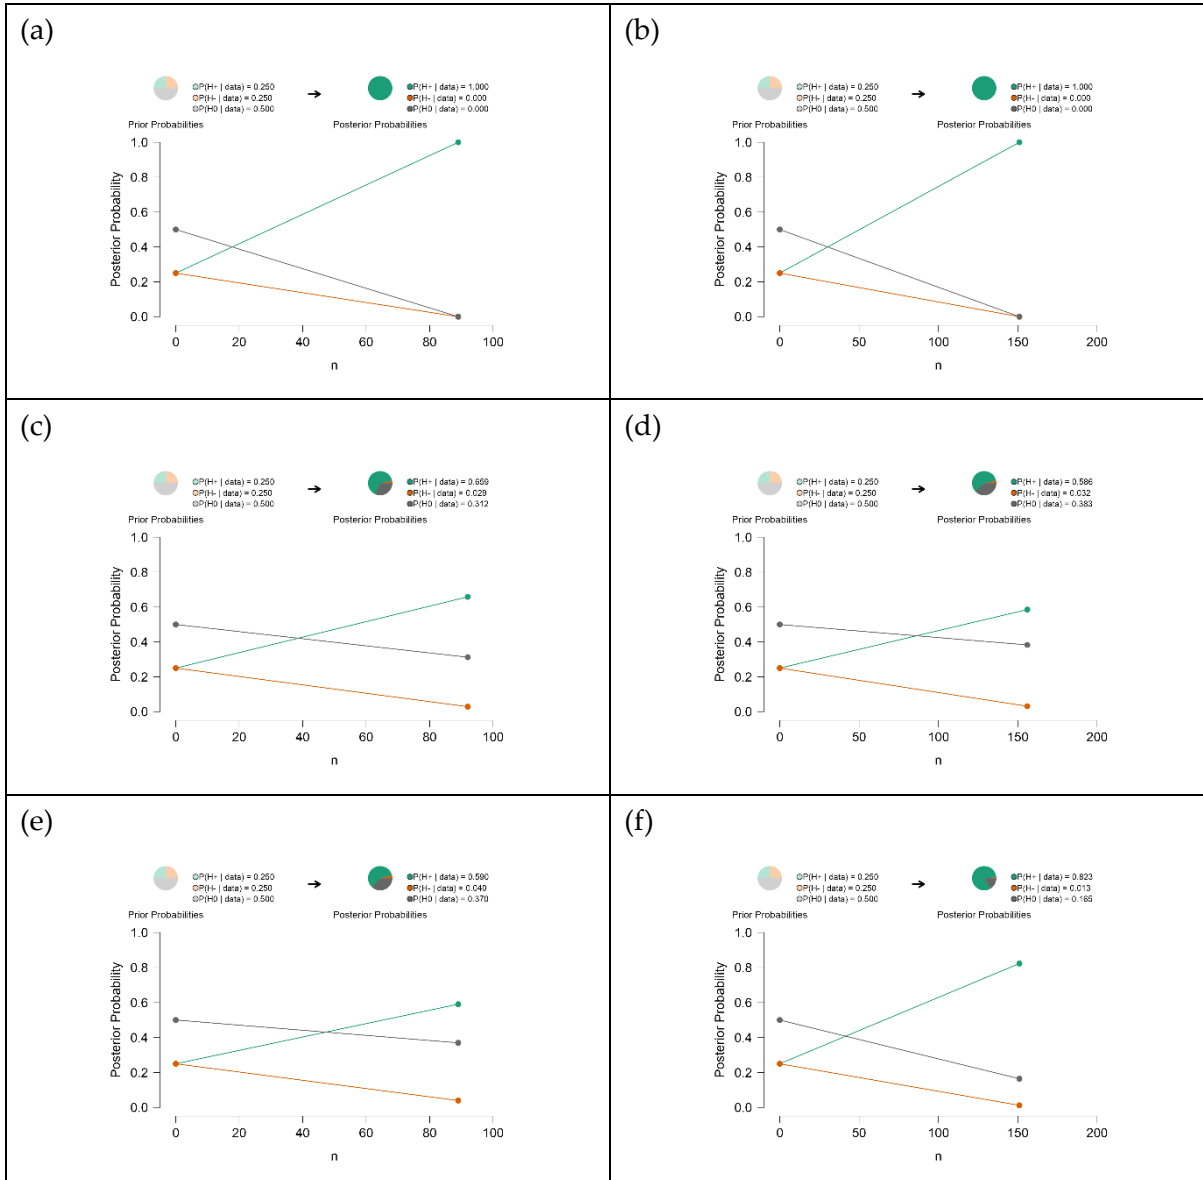

(a) *CHEK2* gene status vs. *CHEK2* truncating mutation and WT; (b) *CHEK2* gene status vs. *CHEK2* truncating mutation and WT group + missense I157T mutation group; (c) *CHEK2* expression vs. *CHEK2* truncating mutation and WT; (d) *CHEK2* expression vs. *CHEK2* truncating mutation and WT group + missense I157T mutation group; (e) *p53* expression and *TP53* gene status vs. *CHEK2* truncating mutation and WT; (f) *p53* expression and *TP53* gene status vs. *CHEK2* expression vs. *CHEK2* truncating mutation and WT group + missense I157T mutation group. Abbreviations: 95% CI, 95% credible interval; *CHEK2* gene status, no loss/deletion of a *CHEK2* gene copy; *TP53* gene status, no loss/deletion of a *TP53* gene copy; FISH, fluorescence in situ hybridization; *p53* expression, negative/positive as determined by IHC; IHC, immunohistochemistry; *CHEK2* truncating, germline heterozygous truncating *CHEK2* mutation variants (1100delC, IVS2+1G>A, del5395); WT, wild type;  $P(H+ | \text{data})$ , the probability of hypothesis  $H+$  given the data;  $P(H- | \text{data})$ , the probability of hypothesis  $H-$  given the data;  $P(H0 | \text{data})$ , the probability of hypothesis  $H0$  given the data.

Figure S5: *CHK2* expression levels in primary papillary thyroid cancer tissue and lymph node metastases.

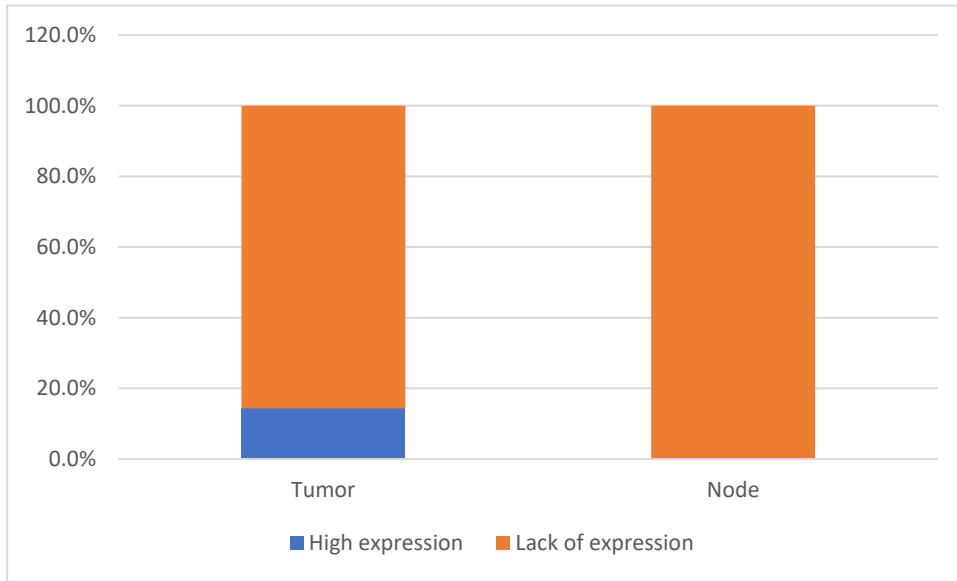

Table S1: Predictive values of the tested hypotheses for the relationships between clinicopathological features, treatment response, and disease outcome and level of CHK2 expression and *TP53* gene status, and p53 expression together with *TP53* status in tumor tissues from PTC patients with and without *CHEK2* germline mutations.

| Variables                                                      | Models             | P(M)  | P(M data) | BF <sub>10</sub> |
|----------------------------------------------------------------|--------------------|-------|-----------|------------------|
| CHK2 expression and response to therapy                        | Log odds ratio = 0 | 0.500 | 0.104     | 1.000            |
|                                                                | Log odds ratio > 0 | 0.250 | 0.007     | 0.135            |
|                                                                | Log odds ratio < 0 | 0.250 | 0.889     | 17.031           |
| CHK2 expression and final follow-up                            | Log odds ratio = 0 | 0.500 | 0.088     | 1.000            |
|                                                                | Log odds ratio > 0 | 0.250 | 0.007     | 0.168            |
|                                                                | Log odds ratio < 0 | 0.250 | 0.905     | 20.554           |
| CHK2 expression and tumor diameter                             | Log odds ratio = 0 | 0.500 | 0.288     | 1.000            |
|                                                                | Log odds ratio > 0 | 0.250 | 0.025     | 0.174            |
|                                                                | Log odds ratio < 0 | 0.250 | 0.687     | 4.766            |
| CHK2 expression and PTC histologic variant                     | Log odds ratio = 0 | 0.500 | 0.289     | 1.000            |
|                                                                | Log odds ratio > 0 | 0.250 | 0.039     | 0.273            |
|                                                                | Log odds ratio < 0 | 0.250 | 0.671     | 4.646            |
| <i>TP53</i> gene status and age                                | Log odds ratio = 0 | 0.500 | 0.308     | 1.000            |
|                                                                | Log odds ratio > 0 | 0.250 | 0.033     | 0.212            |
|                                                                | Log odds ratio < 0 | 0.250 | 0.659     | 4.280            |
| <i>TP53</i> gene status and vascular invasion                  | Log odds ratio = 0 | 0.500 | 0.096     | 1.000            |
|                                                                | Log odds ratio > 0 | 0.250 | 0.010     | 0.208            |
|                                                                | Log odds ratio < 0 | 0.250 | 0.894     | 18.553           |
| p53 expression + <i>TP53</i> gene status and age               | Log odds ratio = 0 | 0.500 | 0.280     | 1.000            |
|                                                                | Log odds ratio > 0 | 0.250 | 0.024     | 0.170            |
|                                                                | Log odds ratio < 0 | 0.250 | 0.696     | 4.962            |
| p53 expression + <i>TP53</i> gene status and vascular invasion | Log odds ratio = 0 | 0.500 | 0.252     | 1.000            |
|                                                                | Log odds ratio > 0 | 0.250 | 0.029     | 0.233            |
|                                                                | Log odds ratio < 0 | 0.250 | 0.719     | 5.713            |

Abbreviations: P(M), prior model probability; P(M|data), posterior model probability; BF<sub>10</sub>, Bayes factor giving the evidence for H1 over H0; CHK2 expression, CHK2 expression (loss/low/high) as determined by IHC; *TP53* gene status, *TP53* no loss/deletion of a gene copy in tumor tissue as determined by FISH; FISH, fluorescence in situ hybridization; p53, positive/negative p53 expression as determined by IHC; IHC, immunohistochemistry

Table S2: Predictive value of tested hypotheses for the association between *CHEK2* gene status, CHK2 expression, and p53 expression together with *TP53* gene status in PTC patients with and without the *CHEK2* germline mutations

| Variable                                   | <i>CHEK2</i> truncating and WT |       |           | <i>CHEK2</i> truncating and WT + missense I157T |       |           |                  |
|--------------------------------------------|--------------------------------|-------|-----------|-------------------------------------------------|-------|-----------|------------------|
|                                            | Models                         | P(M)  | P(M data) | BF <sub>10</sub>                                | P(M)  | P(M data) | BF <sub>10</sub> |
| <i>CHEK2</i> gene status                   | Log odds ratio = 0             | 0.500 | 1.123e-10 | 1.000                                           | 0.500 | 1.898e-15 | 1.000            |
|                                            | Log odds ratio > 0             | 0.250 | 1.000     | 1.781e+10                                       | 0.250 | 1.000     | 1.054e+15        |
|                                            | Log odds ratio < 0             | 0.250 | 2.610e-12 | 0.046                                           | 0.250 | 3.282e-17 | 0.035            |
| CHK2 expression                            | Log odds ratio = 0             | 0.500 | 0.312     | 1.000                                           | 0.500 | 0.383     | 1.000            |
|                                            | Log odds ratio > 0             | 0.250 | 0.659     | 4.215                                           | 0.250 | 0.586     | 3.058            |
|                                            | Log odds ratio < 0             | 0.250 | 0.029     | 0.185                                           | 0.250 | 0.032     | 0.165            |
| p53 expression and <i>TP53</i> gene status | Log odds ratio = 0             | 0.500 | 0.370     | 1.000                                           | 0.500 | 0.165     | 1.000            |
|                                            | Log odds ratio > 0             | 0.250 | 0.590     | 3.194                                           | 0.250 | 0.823     | 9.999            |
|                                            | Log odds ratio < 0             | 0.250 | 0.040     | 0.215                                           | 0.250 | 0.013     | 0.152            |

Abbreviations: *CHEK2* gene status, no loss/deletion of a *CHEK2* gene copy; *TP53* gene status, no loss/deletion of a *TP53* gene copy as determined by FISH; FISH, fluorescence in situ hybridization; p53 expression, negative/positive as determined by IHC; IHC, immunohistochemistry; *CHEK2* truncating, germline heterozygous truncating *CHEK2* mutation variants (1100delC, IVS2+1G>A, del5395); WT, wild type.
